# Supplementary material for: Disclosing the Biocide Activity of α-Ag2−2xCuxWO4 (0 ≤ x ≤ 0.16) Solid Solutions
Source: MDPI journal article supplement (doi:10.3390/ijms231810589), 2022-09-13
Supplement: s1 [file s1]

# Disclosing the biocide activity of $\alpha$ -Ag<sub>2-2x</sub>Cu<sub>x</sub>WO<sub>4</sub> ( $0 \leq x \leq$

## 0.16) solid solutions

Paula Fabiana dos Santos Pereira<sup>1,2</sup>, Camila Cristina De Foggi<sup>3</sup>, Amanda Fernandes Gouveia<sup>2,4</sup>, Ivo Mateus Pinatti<sup>5</sup>, Luís Antônio Cabral<sup>6</sup>, Eva Guillamon<sup>2</sup>, Iván Sorribes<sup>2</sup>, Miguel A. San-Miguel<sup>4</sup>, Carlos Eduardo Vergani<sup>7</sup>, Alexandre Zirpoli Simões<sup>8</sup>, Edison Z. da Silva<sup>6</sup>, Laécio Santos Cavalcante<sup>9</sup>, Rosa Llusar<sup>2</sup>, Elson Longo<sup>1</sup>, Juan Andrés<sup>2\*</sup>

<sup>1</sup>CDMF, LIEC, Department of Chemistry, Federal University of São Carlos (UFSCar), P.O. Box 676, 13565-905 São Carlos, SP, Brazil

<sup>2</sup>Department of Physical and Analytical Chemistry, University Jaume I (UJI), Castelló 12071, Spain

<sup>3</sup>Federal University of Rio Grande do Sul, Faculty of Dental Sciences, Department of Conservative Dentistry, 90035-004, Rio Grande do Sul, RS, Brazil

<sup>4</sup>Institute of Chemistry, State University of Campinas (Unicamp), 13083-859 Campinas, SP, Brazil

<sup>5</sup>Department of Chemistry, Federal University of Maranhao, Avenida dos Portugueses, 1966, São Luís, MA, 65080-805, Brazil

<sup>6</sup>Institute of Physics, "Gleb Wataghin" (IFGW), State University of Campinas, 13083-859 Campinas, SP, Brazil

<sup>7</sup>São Paulo State University (UNESP), P. O. Box 1680, 14801-903, Araraquara-SP, Brazil

<sup>8</sup>Faculty of Engineering of Guaratinguetá, São Paulo State University (UNESP), 12516-410, Guaratinguetá, SP, Brazil

<sup>9</sup>PPGQ-GERATEC, Universidade Estadual do Piauí, Rua: João Cabral, N. 2231, P.O. Box 381, 64002-150, Teresina-PI, Brazil

\*Corresponding author. E-mail address: [andres@qfa.uji.es](mailto:andres@qfa.uji.es)

## Supplementary Material (SM)

## Figures

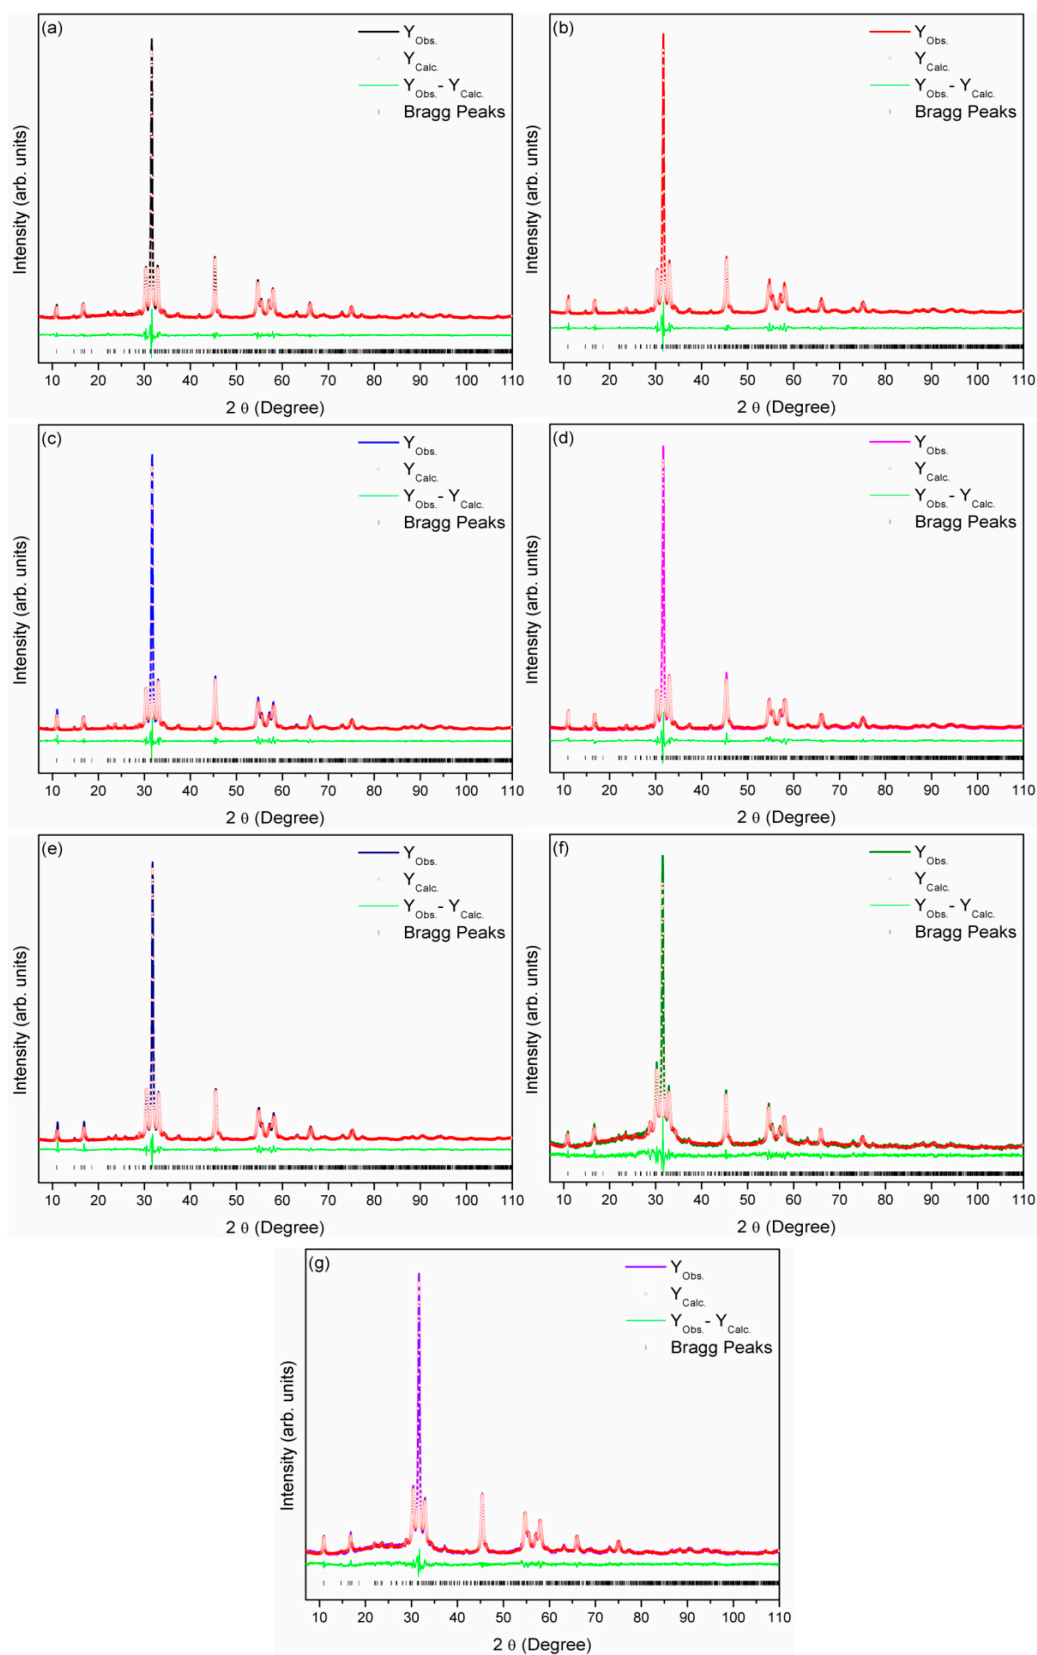

**Figure S1.** Rietveld refinement plot of the  $\alpha$ - $\text{Ag}_{2-2x}\text{Cu}_x\text{O}_4$  solid solutions with: (a)  $x = 0.00$ , (b)  $x = 0.005$ , (c)  $x = 0.01$ , (d)  $x = 0.02$ , (e)  $x = 0.04$ , (f)  $x = 0.08$ , and (g)  $x = 0.16$ .

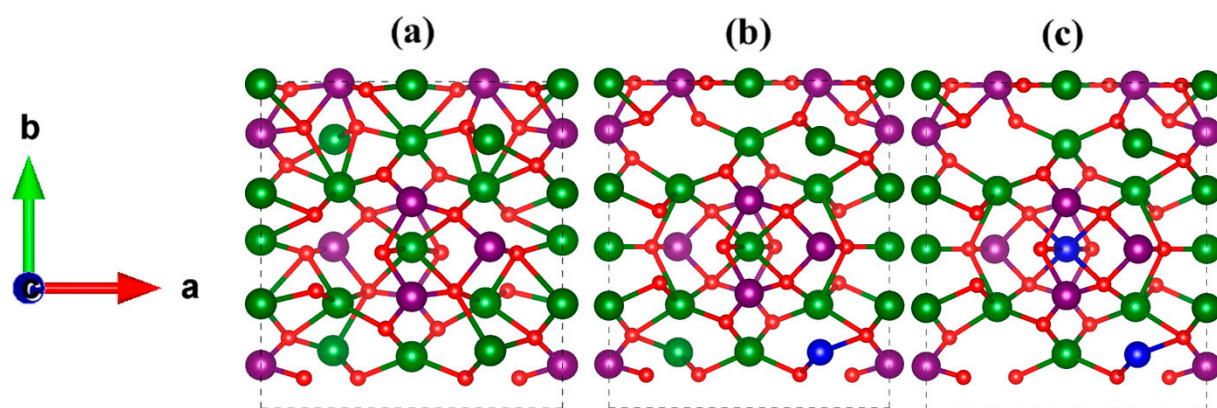

**Figure S2.** Calculated geometries for  $\alpha$ - $\text{Ag}_2\text{WO}_4$  undoped (a), doped by one copper atom (b) and doped by two copper atoms (c). The Cu, Ag, W, and O atoms are represented by blue, green, purple, and red colors, respectively.

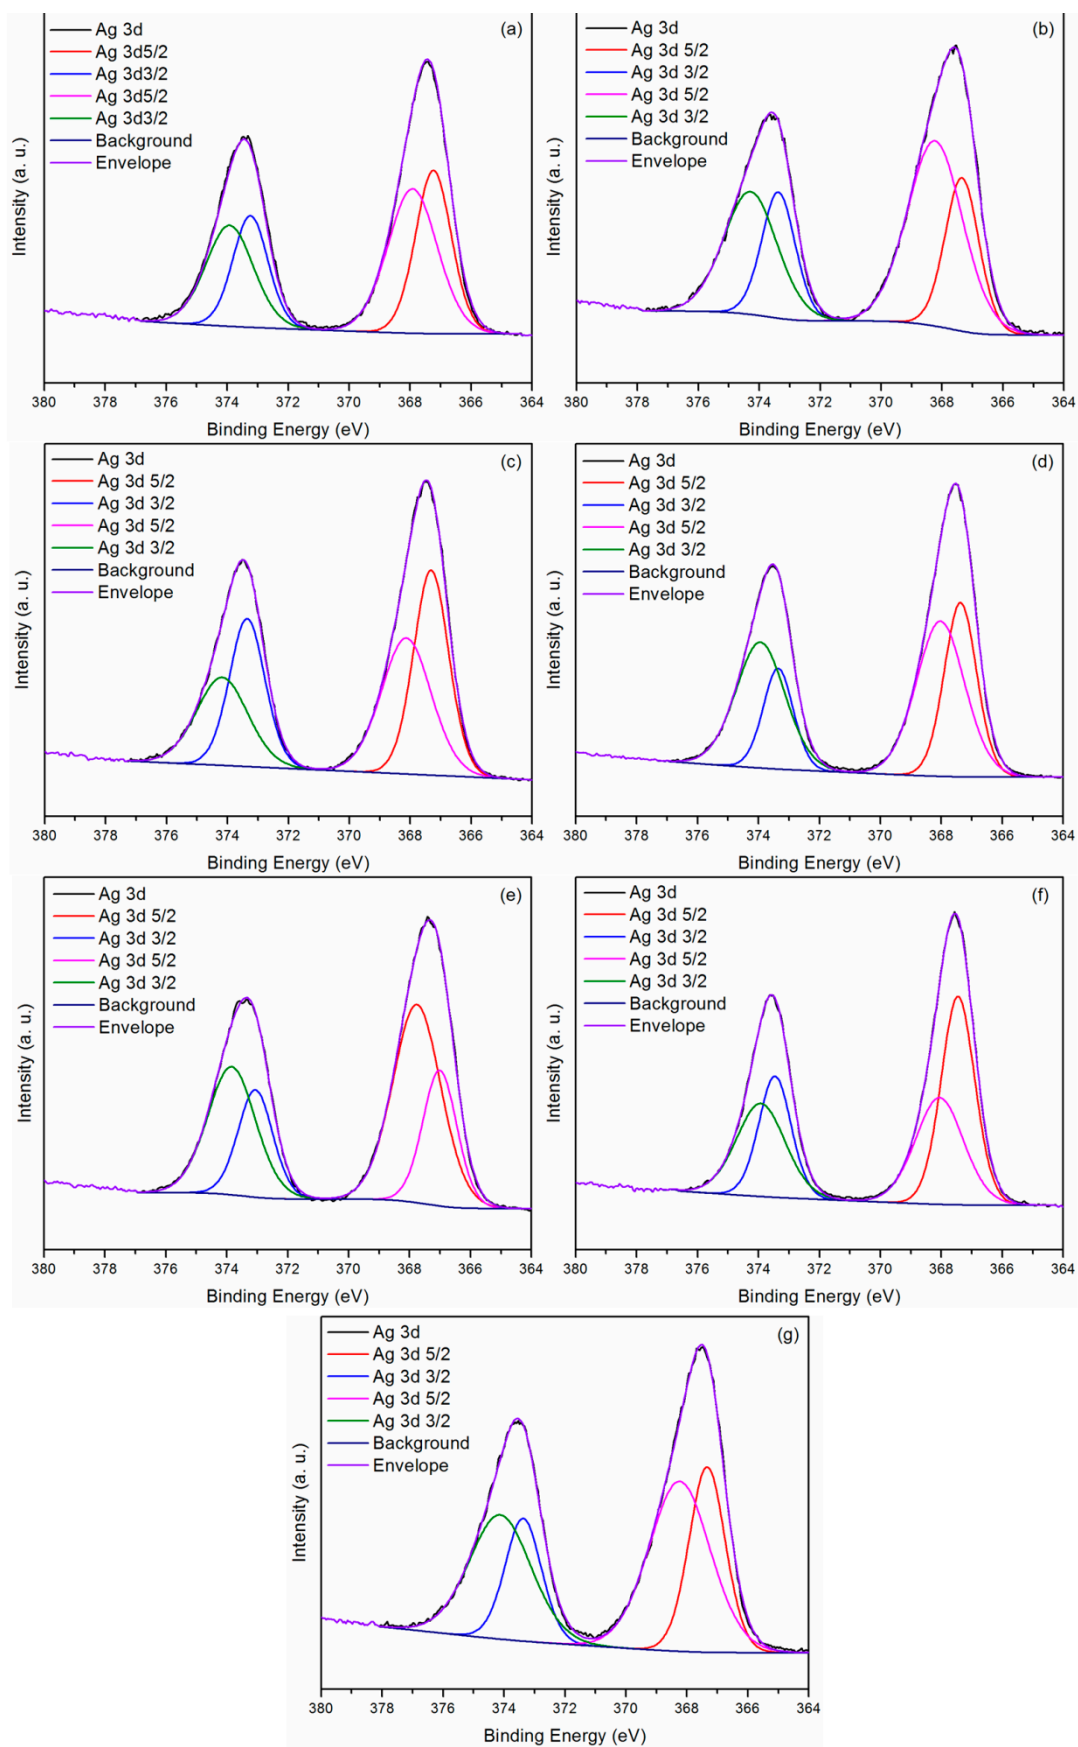

**Figure S3.** Core level spectrum of (a)-(g) Ag-3d; (h)-(n) W-4f and (o)-(u) O-1s.

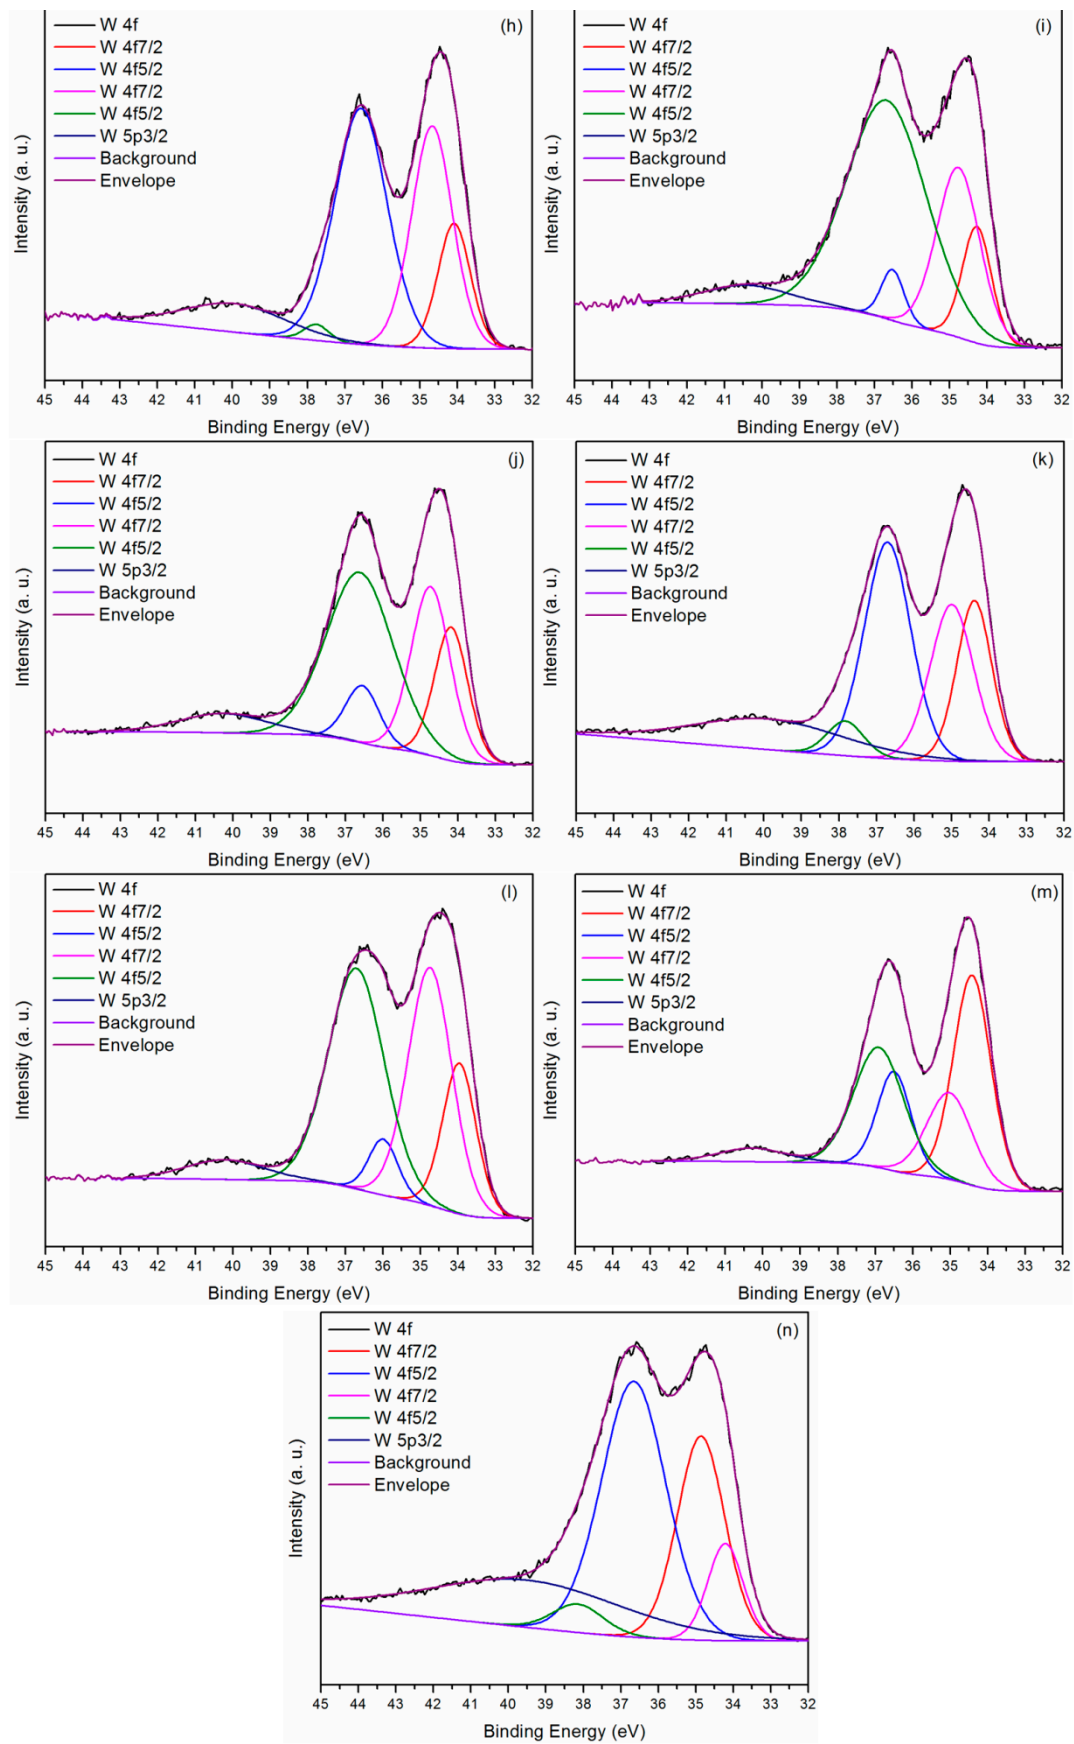

**Figure S3 (cont.).** Core level spectrum of (a)-(g) Ag-3d; (h)-(n) W-4f and (o)-(u) O-1s.

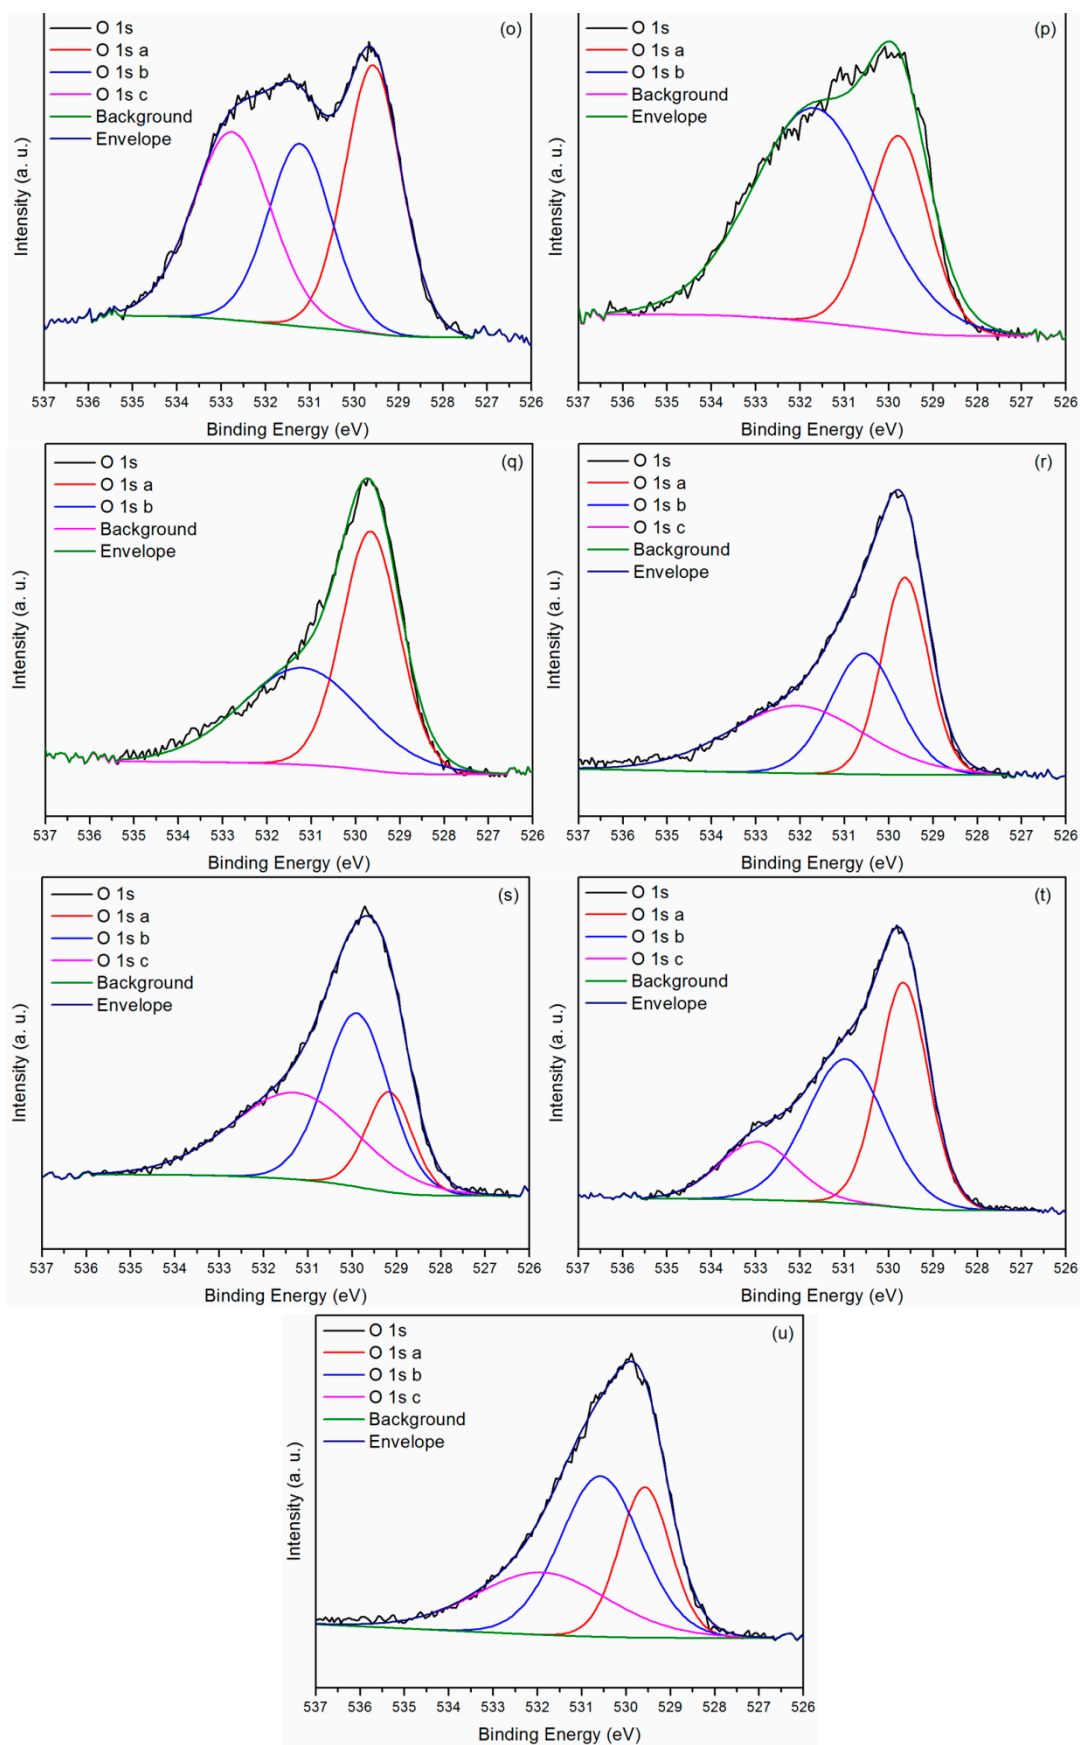

**Figure S3 (cont.).** Core level spectrum of (a)-(g) Ag-3d; (h)-(n) W-4f and (o)-(u) O-1s.

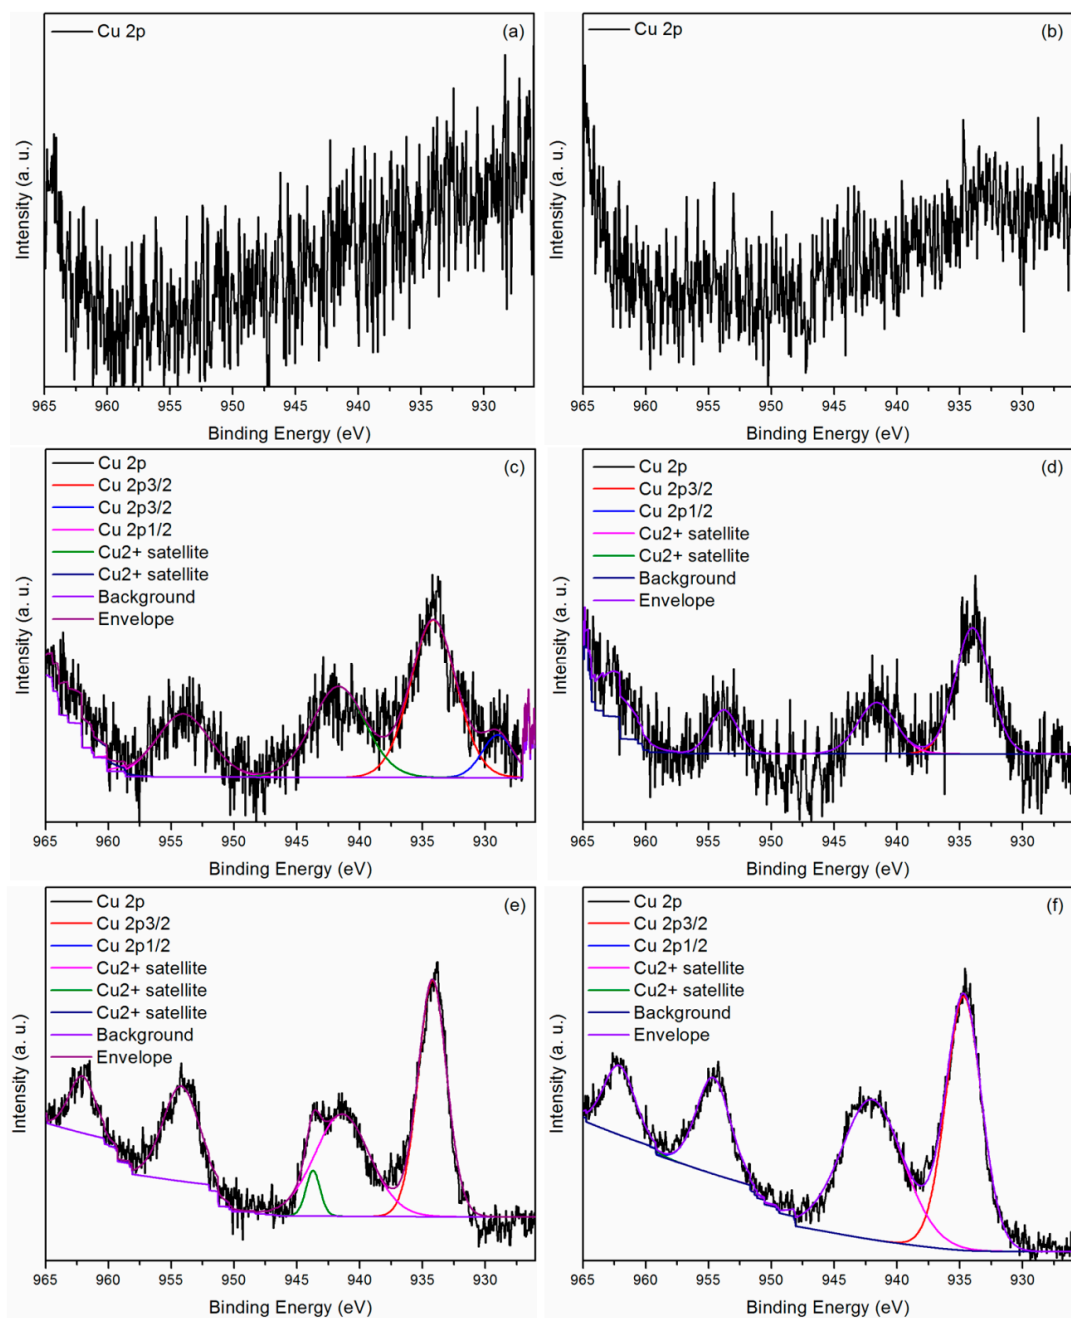

**Figure S4.** Core level spectrum of Cu-2p of the  $\alpha$ -Ag<sub>2-2x</sub>Cu<sub>x</sub>O<sub>4</sub> solid solutions with (a)  $x = 0.005$ ; (b)  $x = 0.01$ ; (c)  $x = 0.02$ ; (d)  $x = 0.04$ ; (e)  $x = 0.08$ ; and (f)  $x = 0.16$ .



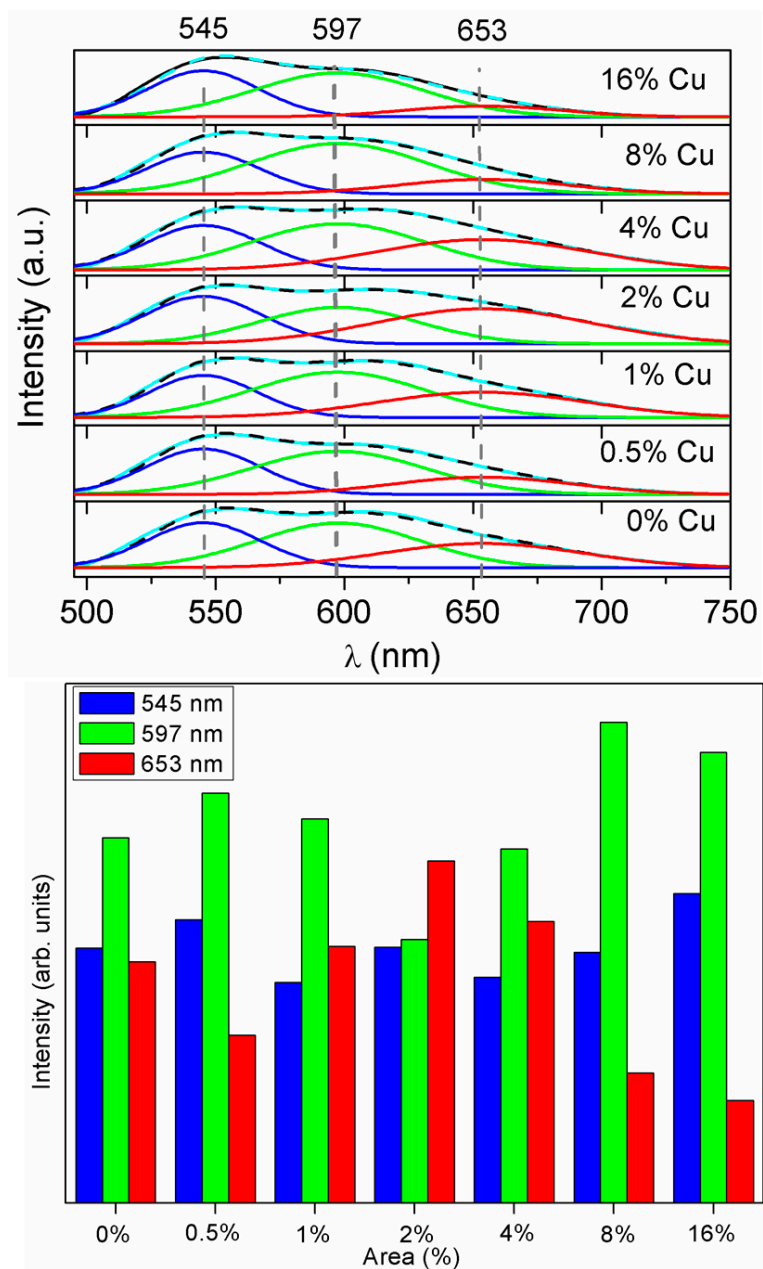

**Figure S6.** Deconvolution of PL spectra of  $\alpha\text{-Ag}_{2-2x}\text{Cu}_x\text{O}_4$  ( $0 \leq x \leq 0.16$ ) solid solutions and area percentage of each color component corresponding to the emission peak.

## Tables

**Table S1.** Lattice parameters, unit cell volume and statistical parameters of quality obtained by Rietveld refinements for the  $\alpha\text{-Ag}_{2-2x}\text{Cu}_x\text{WO}_4$  ( $0 \leq x \leq 0.16$ ) solid solutions.

| Refined<br>formula                                     | Lattice Parameters |           |          | Cell volume<br>(Å <sup>3</sup> ) | R <sub>Bragg</sub> (%) | χ <sup>2</sup> (%) | R <sub>wp</sub> (%) | R <sub>p</sub> (%) |
|--------------------------------------------------------|--------------------|-----------|----------|----------------------------------|------------------------|--------------------|---------------------|--------------------|
|                                                        | a (Å)              | b (Å)     | c (Å)    |                                  |                        |                    |                     |                    |
| <b>α-Ag<sub>2-2x</sub>Cu<sub>x</sub>WO<sub>4</sub></b> |                    |           |          |                                  |                        |                    |                     |                    |
| <i>x</i> = 0.00                                        | 10.880(0)          | 12.027(3) | 5.901(2) | 772.22(7)                        | 2.06                   | 1.60               | 8.79                | 6.98               |
| <i>x</i> = 0.005                                       | 10.868(1)          | 12.029(2) | 5.902(2) | 771.63(2)                        | 1.79                   | 1.74               | 9.63                | 7.72               |
| <i>x</i> = 0.01                                        | 10.863(8)          | 12.026(5) | 5.899(8) | 770.84(5)                        | 1.93                   | 1.67               | 9.31                | 7.22               |
| <i>x</i> = 0.02                                        | 10.862(4)          | 12.025(7) | 5.902(2) | 771.00(5)                        | 2.25                   | 1.98               | 10.30               | 8.10               |
| <i>x</i> = 0.04                                        | 10.865(1)          | 12.027(6) | 5.897(0) | 770.63(6)                        | 2.11                   | 1.66               | 9.47                | 7.25               |
| <i>x</i> = 0.08                                        | 10.853(6)          | 12.030(0) | 5.899(4) | 770.29(1)                        | 2.98                   | 1.45               | 8.12                | 6.49               |
| <i>x</i> = 0.16                                        | 10.881(0)          | 12.027(4) | 5.890(8) | 770.93(9)                        | 2.50                   | 1.43               | 7.68                | 6.01               |
| ICSD N°4165                                            | 10.89(2)           | 12.03(2)  | 5.92(2)  | 775.56                           | -                      | -                  | -                   | -                  |

**Table S2.** Atomic positions of the  $\alpha$ -Ag<sub>2-2x</sub>Cu<sub>x</sub>O<sub>4</sub> solid solutions with  $x = 0.00$  and  $0.005$ .

[illegible]

**Table S3.** Atomic positions of the  $\alpha$ -Ag<sub>2-2x</sub>Cu<sub>x</sub>O<sub>4</sub> solid solutions with  $x = 0.01$  and  $0.02$ .

| $\alpha$ -Ag <sub>2-2x</sub> Cu <sub>x</sub> O <sub>4</sub> solid solutions |            |            |           |               |               |            |           |           |               |               |
|-----------------------------------------------------------------------------|------------|------------|-----------|---------------|---------------|------------|-----------|-----------|---------------|---------------|
| Atoms                                                                       | $x = 0.01$ |            |           |               |               | $x = 0.02$ |           |           |               |               |
|                                                                             | x          | y          | z         | Wyckoff Sites | Occupancy (%) | x          | y         | z         | Wyckoff Sites | Occupancy (%) |
| W1                                                                          | 0.2564(8)  | -0.0031(5) | 0.5177(9) | 4 c           | 100           | 0.2540(0)  | 0.000     | 0.5255(0) | 4 c           | 100           |
| W2                                                                          | 0.000      | 0.8443(4)  | 0.500     | 2 b           | 100           | 0.000      | 0.8475(0) | 0.500     | 2 b           | 100           |
| W3                                                                          | 0.000      | 0.1348(4)  | 0.500     | 2 b           | 100           | 0.000      | 0.1380(0) | 0.500     | 2 b           | 100           |
| Ag1                                                                         | 0.7559(4)  | 0.1744(7)  | 0.9899(3) | 4 c           | 100           | 0.7509(0)  | 0.1711(0) | 0.9877(0) | 4 c           | 100           |
| Ag2                                                                         | 0.2399(4)  | 0.8209(7)  | 0.0114(3) | 4 c           | 100           | 0.2349(0)  | 0.8176(0) | 0.0092(0) | 4 c           | 100           |
| Ag3                                                                         | 0.000      | 0.9905(7)  | 0.000     | 2 a           | 100           | 0.000      | 0.9872(0) | 0.000     | 2 a           | 100           |
| Ag4                                                                         | 0.000      | 0.6564(7)  | 0.000     | 2 a           | 100           | 0.000      | 0.6531(0) | 0.000     | 2 a           | 100           |
| Ag5                                                                         | 0.000      | 0.3181(7)  | 0.000     | 2 a           | 100           | 0.000      | 0.3148(0) | 0.000     | 2 a           | 100           |
| Ag6                                                                         | 0.000      | 0.5125(7)  | 0.500     | 2 b           | 100           | 0.000      | 0.5092(0) | 0.500     | 2 b           | 100           |
| O1                                                                          | 0.3701(0)  | 0.5998(7)  | 0.1864(4) | 4 c           | 100           | 0.3680(0)  | 0.6120(0) | 0.1950(0) | 4 c           | 100           |
| O2                                                                          | 0.3701(0)  | 0.3658(7)  | 0.1794(4) | 4 c           | 100           | 0.3717(0)  | 0.3780(0) | 0.1880(0) | 4 c           | 100           |
| O3                                                                          | 0.4211(0)  | 0.7228(7)  | 0.8064(4) | 4 c           | 100           | 0.4227(0)  | 0.7350(0) | 0.8150(0) | 4 c           | 100           |
| O4                                                                          | 0.4271(0)  | 0.2508(7)  | 0.7834(4) | 4 c           | 100           | 0.4287(0)  | 0.2630(0) | 0.7920(0) | 4 c           | 100           |
| O5                                                                          | 0.1641(0)  | 0.4818(7)  | 0.2734(4) | 4 c           | 100           | 0.1657(0)  | 0.4940(0) | 0.2820(0) | 4 c           | 100           |
| O6                                                                          | 0.4161(0)  | 0.4838(7)  | 0.8384(4) | 4 c           | 100           | 0.4177(0)  | 0.4960(0) | 0.8470(0) | 4 c           | 100           |
| O7                                                                          | 0.1911(0)  | 0.5998(7)  | 0.8484(4) | 4 c           | 100           | 0.1927(0)  | 0.6120(0) | 0.8570(0) | 4 c           | 100           |
| O8                                                                          | 0.1951(0)  | 0.3668(7)  | 0.8914(4) | 4 c           | 100           | 0.1967(0)  | 0.3790(0) | 0.9000(0) | 4 c           | 100           |
| Cu1                                                                         | -          | -          | -         | -             | -             | -          | -         | -         | -             | -             |
| Cu2                                                                         | -          | -          | -         | -             | -             | -          | -         | -         | -             | -             |
| Cu3                                                                         | -          | -          | -         | -             | -             | -          | -         | -         | -             | -             |
| Cu4                                                                         | -          | -          | -         | -             | -             | -          | -         | -         | -             | -             |
| Cu5                                                                         | -          | -          | -         | -             | -             | -          | -         | -         | -             | -             |
| Cu6                                                                         | -          | -          | -         | -             | -             | -          | -         | -         | -             | -             |

**Table S4.** Atomic positions of the  $\alpha$ -Ag<sub>2-2x</sub>Cu<sub>x</sub>O<sub>4</sub> solid solutions with  $x = 0.04$  and  $0.08$ .

| $\alpha$ -Ag <sub>2-2x</sub> Cu <sub>x</sub> O <sub>4</sub> solid solutions |            |            |           |               |               |            |            |           |               |               |
|-----------------------------------------------------------------------------|------------|------------|-----------|---------------|---------------|------------|------------|-----------|---------------|---------------|
| Atoms                                                                       | $x = 0.04$ |            |           |               |               | $x = 0.08$ |            |           |               |               |
|                                                                             | x          | y          | z         | Wyckoff Sites | Occupancy (%) | x          | y          | z         | Wyckoff Sites | Occupancy (%) |
| W1                                                                          | 0.2577(8)  | -0.0019(0) | 0.5192(6) | 4 c           | 100           | 0.2599(0)  | -0.0032(9) | 0.5274(5) | 4 c           | 100           |
| W2                                                                          | 0.000      | 0.8455(9)  | 0.500     | 2 b           | 100           | 0.000      | 0.8442(0)  | 0.500     | 2 b           | 100           |
| W3                                                                          | 0.000      | 0.1360(9)  | 0.500     | 2 b           | 100           | 0.000      | 0.1347(0)  | 0.500     | 2 b           | 100           |
| Ag1                                                                         | 0.7519(6)  | 0.1732(0)  | 0.9917(5) | 4 c           | 100           | 0.7551(4)  | 0.1752(5)  | 0.9922(8) | 4 c           | 84.01         |
| Ag2                                                                         | 0.2359(6)  | 0.8197(0)  | 0.0132(5) | 4 c           | 100           | 0.2391(4)  | 0.8217(5)  | 0.0137(8) | 4 c           | 100           |
| Ag3                                                                         | 0.000      | 0.9893(0)  | 0.000     | 2 a           | 100           | 0.000      | 0.9913(5)  | 0.000     | 2 a           | 100           |
| Ag4                                                                         | 0.000      | 0.6552(0)  | 0.000     | 2 a           | 100           | 0.000      | 0.6572(5)  | 0.000     | 2 a           | 100           |
| Ag5                                                                         | 0.000      | 0.3169(0)  | 0.000     | 2 a           | 100           | 0.000      | 0.3189(5)  | 0.000     | 2 a           | 100           |
| Ag6                                                                         | 0.000      | 0.5113(0)  | 0.500     | 2 b           | 100           | 0.000      | 0.5133(5)  | 0.500     | 2 b           | 100           |
| O1                                                                          | 0.3717(7)  | 0.6016(5)  | 0.1770(5) | 4 c           | 100           | 0.3735(3)  | 0.6031(1)  | 0.1854(4) | 4 c           | 100           |
| O2                                                                          | 0.3717(7)  | 0.3676(5)  | 0.1700(5) | 4 c           | 100           | 0.3735(3)  | 0.3691(1)  | 0.1784(4) | 4 c           | 100           |
| O3                                                                          | 0.4227(7)  | 0.7246(5)  | 0.7970(5) | 4 c           | 100           | 0.4245(3)  | 0.7261(1)  | 0.8054(4) | 4 c           | 100           |
| O4                                                                          | 0.4287(7)  | 0.2526(5)  | 0.7740(5) | 4 c           | 100           | 0.4305(3)  | 0.2541(1)  | 0.7824(4) | 4 c           | 100           |
| O5                                                                          | 0.1657(7)  | 0.4836(5)  | 0.2640(5) | 4 c           | 100           | 0.1675(3)  | 0.4851(1)  | 0.2724(4) | 4 c           | 100           |
| O6                                                                          | 0.4177(7)  | 0.4856(5)  | 0.8290(5) | 4 c           | 100           | 0.4195(3)  | 0.4871(1)  | 0.8374(4) | 4 c           | 100           |
| O7                                                                          | 0.1927(7)  | 0.6016(5)  | 0.8390(5) | 4 c           | 100           | 0.1945(3)  | 0.6031(1)  | 0.8474(4) | 4 c           | 100           |
| O8                                                                          | 0.1967(7)  | 0.3686(5)  | 0.8820(5) | 4 c           | 100           | 0.1985(3)  | 0.3701(1)  | 0.8904(4) | 4 c           | 100           |
| Cu1                                                                         | -          | -          | -         | -             | -             | 0.7509(0)  | 0.1711(0)  | 0.9877(0) | 4 c           | 8.0           |
| Cu2                                                                         | -          | -          | -         | -             | -             | 0.2349(0)  | 0.8176(0)  | 0.0092(0) | 4 c           | 0.0           |
| Cu3                                                                         | -          | -          | -         | -             | -             | 0.000      | 0.9872(0)  | 0.000     | 2 a           | 0.0           |
| Cu4                                                                         | -          | -          | -         | -             | -             | 0.000      | 0.6531(0)  | 0.000     | 2 a           | 0.0           |
| Cu5                                                                         | -          | -          | -         | -             | -             | 0.000      | 0.3148(0)  | 0.000     | 2 a           | 0.0           |
| Cu6                                                                         | -          | -          | -         | -             | -             | 0.000      | 0.5092(0)  | 0.500     | 2 b           | 0.0           |

**Table S5.** Atomic positions of the  $\alpha$ -Ag<sub>2-2x</sub>Cu<sub>x</sub>O<sub>4</sub> solid solutions with  $x = 0.16$ .

| $\alpha$ -Ag <sub>2-2x</sub> Cu <sub>x</sub> WO <sub>4</sub> solid solutions |            |            |           |               |               |
|------------------------------------------------------------------------------|------------|------------|-----------|---------------|---------------|
| Atoms                                                                        | $x = 0.16$ |            |           |               |               |
|                                                                              | x          | y          | z         | Wyckoff Sites | Occupancy (%) |
| W1                                                                           | 0.2593(2)  | -0.0045(2) | 0.5202(5) | 4 c           | 100           |
| W2                                                                           | 0.000      | 0.8429(7)  | 0.500     | 2 b           | 100           |
| W3                                                                           | 0.000      | 0.1334(7)  | 0.500     | 2 b           | 100           |
| Ag1                                                                          | 0.7542(9)  | 0.1760(1)  | 0.9926(1) | 4 c           | 73.82         |
| Ag2                                                                          | 0.2382(9)  | 0.8225(1)  | 0.0141(1) | 4 c           | 100           |
| Ag3                                                                          | 0.000      | 0.9921(1)  | 0.000     | 2 a           | 94.24         |
| Ag4                                                                          | 0.000      | 0.6580(1)  | 0.000     | 2 a           | 100           |
| Ag5                                                                          | 0.000      | 0.3197(1)  | 0.000     | 2 a           | 100           |
| Ag6                                                                          | 0.000      | 0.5141(1)  | 0.500     | 2 b           | 100           |
| O1                                                                           | 0.3704(8)  | 0.5952(7)  | 0.1856(0) | 4 c           | 100           |
| O2                                                                           | 0.3704(8)  | 0.3612(7)  | 0.1786(0) | 4 c           | 100           |
| O3                                                                           | 0.4214(8)  | 0.7182(7)  | 0.8056(0) | 4 c           | 100           |
| O4                                                                           | 0.4274(8)  | 0.2462(7)  | 0.7826(0) | 4 c           | 100           |
| O5                                                                           | 0.1644(8)  | 0.4772(7)  | 0.2726(0) | 4 c           | 100           |
| O6                                                                           | 0.4164(8)  | 0.4792(7)  | 0.8376(0) | 4 c           | 100           |
| O7                                                                           | 0.1914(8)  | 0.5952(7)  | 0.8476(0) | 4 c           | 100           |
| O8                                                                           | 0.1954(8)  | 0.3622(7)  | 0.8906(0) | 4 c           | 100           |
| Cu1                                                                          | 0.7509(0)  | 0.1711(0)  | 0.9877(0) | 4 c           | 13.09         |
| Cu2                                                                          | 0.2349(0)  | 0.8176(0)  | 0.0092(0) | 4 c           | 0.0           |
| Cu3                                                                          | 0.000      | 0.9872(0)  | 0.000     | 2 a           | 2.88          |
| Cu4                                                                          | 0.000      | 0.6531(0)  | 0.000     | 2 a           | 0.0           |
| Cu5                                                                          | 0.000      | 0.3148(0)  | 0.000     | 2 a           | 0.0           |
| Cu6                                                                          | 0.000      | 0.5092(0)  | 0.500     | 2 b           | 0.0           |

**Table S6.** Values of peaks ratios in At% between C, Ag, W, O, and Cu for typical XPS survey spectra of  $\alpha\text{-Ag}_{2-2x}\text{Cu}_x\text{WO}_4$  ( $0 \leq x \leq 0.16$ ) solid solutions.

| $\alpha\text{-Ag}_{2-2x}\text{Cu}_x\text{WO}_4$<br>solid solutions | C-1s  | Ag-3d | W-4d | O-1s  | Cu-2p |
|--------------------------------------------------------------------|-------|-------|------|-------|-------|
| $x = 0.00$                                                         | 67.46 | 7.35  | 1.23 | 23.95 | -     |
| $x = 0.005$                                                        | 63.41 | 7.42  | 1.89 | 27.28 | -     |
| $x = 0.01$                                                         | 49.83 | 13.21 | 3.87 | 33.09 | -     |
| $x = 0.02$                                                         | 56.75 | 9.73  | 3.56 | 29.42 | 0.55  |
| $x = 0.04$                                                         | 48.93 | 15.46 | 3.12 | 31.95 | 0.54  |
| $x = 0.08$                                                         | 58.09 | 6.88  | 4.57 | 30.16 | 0.30  |
| $x = 0.16$                                                         | 60.69 | 5.01  | 2.56 | 31.55 | 0.20  |

**Table S7.** FWHM values, intensities, and positions of the Raman peaks of  $\alpha\text{-Ag}_{2-2x}\text{Cu}_x\text{WO}_4$  ( $0 \leq x \leq 0.16$ ) solid solutions.

| $\alpha\text{-Ag}_{2-2x}\text{Cu}_x\text{WO}_4$ solid<br>solutions | FWHM   | Intensities | Positions<br>$2\theta$ ( $^\circ$ ) |
|--------------------------------------------------------------------|--------|-------------|-------------------------------------|
| $x = 0.00$                                                         | 19.148 | 0.850       | 879.60                              |
| $x = 0.005$                                                        | 16.598 | 0.891       | 879.65                              |
| $x = 0.01$                                                         | 21.844 | 0.863       | 878.82                              |
| $x = 0.02$                                                         | 16.687 | 0.902       | 879.41                              |
| $x = 0.04$                                                         | 16.911 | 0.875       | 879.68                              |
| $x = 0.08$                                                         | 18.171 | 0.840       | 879.76                              |
| $x = 0.16$                                                         | 17.791 | 0.939       | 880.01                              |
